# Supplementary material for: Leaf Mold Extract Agar Facilitates Recovery of Soil Bacterial Diversity Beyond Bacillus Dominance
Source: Research Square preprint supplement (doi:10.21203/rs.3.rs-7127727/v1), 2025-07-25
Supplement: Supplementary file 1 [file 3a8a28cf5958907ade152b21.docx]

**Supplemental Materials**

**Supplementary Table S1. List of Bacteria Grown on YME Agar Medium**

The 16S rRNA sequences of 93 bacterial strains (sample 1: 57, sample 2: 18, sample 3: 18) grown on YME agar were analyzed and compared with the NCBI standard database. The closest related species in the database, their genus, GenBank accession number, read length, match rate, and number of matching basepairs are summarized in this table. Isolates marked with an asterisk (*) indicate that there were multiple species with the same match rate in the database for the 16S rRNA analysis conducted in this study. The respective species are as follows: *1: *Priestia megaterium*, *2: *Priestia aryabhattai*, *3: *Bacillus zanthoxyli*, *4: *Burkholderia* sp., *5: *Bacillus arbutinivorans*., *6: *Streptomyces* sp.. In cases where an NCBI Reference Sequence was shown instead of a GenBank accession number in the NCBI database, an asterisk followed by the number 7 (*7) was added. To draw the pie chart in Figure 3, the genus names listed in the table were used.

**Supplementary Table S2. List of Bacteria Grown on Leaf Mold Agar Medium**

The 16S rRNA sequences of 138 bacterial strains (sample 1: 71, sample 2: 28, sample 3: 39) grown on leaf mold agar were analyzed and matched with the NCBI rRNA sequence database (A: 127 identified species, B: 11 unidentified species). The species identified as the closest relative in the database, their genus, GenBank accession number, read length, match rate, and number of matching base pairs are compiled in this table as Identified isolates. Strains with a match rate less than 98.7% to the closest related strain in the database were designated as unidentified species and compiled as Unidentified isolates. Isolates marked with an asterisk (*) indicate that there were multiple species with the same match rate in the database for the 16S rRNA analysis conducted in this study. The respective species are as follows: *1: *Streptomyces* sp., *2: *Actinacidphila glacinigra*, *3: *Bacillus zanthoxyli*, *4: *Priestia megaterium.* However, the genus names listed in the table were used when creating the pie chart in Figure 3. In cases where an NCBI Reference Sequence was shown instead of a GenBank accession number in the NCBI database, an asterisk followed by the number 5 (*5) was added. The bacterial species shown in the "Most closely related species" column of list B were indicated in the database as the closest matches to the respective unidentified isolates.

**Gels and Blots images**The present study does not include any electrophoresis gel or blot images.
