# Supplementary material for: Leaf Mold Extract Agar Facilitates Recovery of Soil Bacterial Diversity Beyond Bacillus Dominance
Source: Research Square preprint supplement (doi:10.21203/rs.3.rs-7127727/v1), 2025-07-25
Supplement: Supplementary file 2 [file 779384052b78f607838aa2ff.xlsx]

## Sheet: Table S1
Supplementary Table S1. List of Bacteria Grown on YME Agar Medium
No.	Strain Name	Most closely related species	Genus	GenBank accession No.	Read length (bp)	Identity (%)	Identical base pair	Sample
1	Sample1_YME1	Bacillus huizhouensis (*1)	Bacillus	MT071364.1	884	100	884/884	1
2	Sample1_YME2	Bacillus velezensis	Bacillus	CP120573.2	690	100	690/690	1
3	Sample1_YME3	Bacillus subtilis	Bacillus	PQ757064.1	756	100	756/756	1
4	Sample1_YME4	Bacillus proteolyticus	Bacillus	PV093913.1	915	100	915/915	1
5	Sample1_YME5	Bacillus aryabhattai (*2)	Bacillus	KY393009.1	898	100	898/898	1
6	Sample1_YME6	Bacillus subtilis	Bacillus	CP120598.2	909	100	909/909	1
7	Sample1_YME7	Bacillus zanthoxyli (*2)	Bacillus	PQ896515.1	650	100	650/650	1
8	Sample1_YME8	Bacillus zanthoxyli (*2)	Bacillus	OR755654.1	844	100	844/844	1
9	Sample1_YME9	Bacillus subtilis	Bacillus	CP120598.2	901	100	901/901	1
10	Sample1_YME10	Bacillus zanthoxyli (*2)	Bacillus	PQ896515.1	886	100	886/886	1
11	Sample1_YME11	Streptomyces sp.	Streptomyces	MF197388.1	925	100	925/925	1
12	Sample1_YME12	Priestia megaterium (*3)	Bacillus	PV467087.1	883	100	883/883	1
13	Sample1_YME13	Streptomyces rubiginosohelvolus	Streptomyces	MT804178.1	829	100	829/829	1
14	Sample1_YME14	Bacillus paralicheniformis	Bacillus	PQ846726.1	853	100	853/853	1
15	Sample1_YME15	Streptomyces sp.	Streptomyces	MF197388.1	900	100	900/900	1
16	Sample1_YME16	Bacillus paralicheniformis	Bacillus	PV491381.1	760	100	760/760	1
17	Sample1_YME17	Caballeronia insecticola (*4)	Caballeronia	NR_178243.1 (*7)	833	100	833/833	1
18	Sample1_YME18	Bacillus thuringiensis	Bacillus	CP185989.1	842	99.88	841/842	1
19	Sample1_YME19	Bacillus zanthoxyli (*2)	Bacillus	PQ870073.1	908	100	908/908	1
20	Sample1_YME20	Bacillus amyloliquefaciens	Bacillus	CP187258.1	681	100	681/681	1
21	Sample1_YME21	Bacillus thuringiensis	Bacillus	CP185989.1	797	100	797/797	1
22	Sample1_YME22	Bacillus licheniformis	Bacillus	PV474241.1	863	99.65	860/863	1
23	Sample1_YME23	Paenibacillus favisporus	Paenibacillus	MN421076.1	863	100	863/863	1
24	Sample1_YME24	Priestia aryabhattai (*3)	Priestia	PV478422.1	859	100	859/859	1
25	Sample1_YME25	Bacillus safensis	Bacillus	CP121752.2	846	100	846/846	1
26	Sample1_YME26	Bacillus licheniformis	Bacillus	PV474241.1	863	99.77	861/863	1
27	Sample1_YME27	Priestia megaterium	Priestia	LC807620.1	873	99.89	872/873	1
28	Sample1_YME28	Streptomyces zaomyceticus	Streptomyces	MT525265.1	878	100	878/878	1
29	Sample1_YME29	Streptomyces sp.	Streptomyces	KM598621.1	853	99.65	850/853	1
30	Sample1_YME30	Bacillus mobilis	Bacillus	PV370807.1	876	100	876/876	1
31	Sample1_YME31	Streptomyces canus	Streptomyces	MT525244.1	877	99.89	876/877	1
32	Sample1_YME32	Bacillus sonorensis	Bacillus	PV336128.1	863	99.88	862/863	1
33	Sample1_YME33	Priestia megaterium (*3)	Priestia	CP150971.1	880	100	880/880	1
34	Sample1_YME34	Rhizobium sp.	Rhizobium	OR426256.1	930	99.78	928/930	1
35	Sample1_YME35	Priestia megaterium (*3)	Priestia	CP150971.1	877	100	877/877	1
36	Sample1_YME36	Priestia aryabhattai (*3)	Priestia	PV478422.1	844	1	844/844	1
37	Sample1_YME37	Priestia megaterium (*3)	Priestia	PP754340.1	861	99.77	859/861	1
38	Sample1_YME38	Bacillus subtilis	Bacillus	CP120598.2	864	100	864/864	1
39	Sample1_YME39	Streptomyces hachijoensis	Streptomyces	AB184499.1	877	100	877/877	1
40	Sample1_YME40	Bacillus cereus	Bacillus	CP187290.1	940	100	940/940	1
41	Sample1_YME41	Bacillus cereus	Bacillus	LT548956.1	854	99.88	853/854	1
42	Sample1_YME42	Priestia megaterium	Priestia	CP150971.1	697	100	697/697	1
43	Sample1_YME43	Priestia megaterium (*3)	Priestia	CP150971.1	872	100	872/872	1
44	Sample1_YME44	Bacillus wiedmannii	Bacillus	CP032365.1	824	100	824/824	1
45	Sample1_YME45	Neobacillus drentensis (*5)	Neobacillus	PQ782941.1	843	100	843/843	1
46	Sample1_YME46	Priestia megaterium (*3)	Priestia	PV426443.1	908	100	908/908	1
47	Sample1_YME47	Bacillus subtilis	Bacillus	CP120598.2	859	100	859/859	1
48	Sample1_YME48	Bacillus aryabhattai (*1)	Bacillus	MT184818.1	866	100	866/866	1
49	Sample1_YME49	Streptomyces durhamensis	Streptomyces	KY407754.1	894	99.78	892/894	1
50	Sample1_YME50	Bacillus subtilis	Bacillus	CP120598.2	899	99.89	898/899	1
51	Sample1_YME51	Bacillus subtilis	Bacillus	CP120598.2	884	99.89	883/884	1
52	Sample1_YME52	Priestia megaterium (*3)	Priestia	PP754340.1	843	100	843/843	1
53	Sample1_YME53	Bacillus licheniformis	Bacillus	PV471162.1	817	100	817/817	1
54	Sample1_YME54	Bacillus aryabhattai (*1)	Bacillus	MT184818.1	872	99.89	871/872	1
55	Sample1_YME55	Bacillus safensis	Bacillus	MK640707.1	829	99.88	828/829	1
56	Sample1_YME56	Streptomyces virginiae	Streptomyces	MT525258.1	894	100	894/894	1
57	Sample1_YME57	Streptomyces hachijoensis	Streptomyces	AB748974.1	874	99.89	873/874	1
58	Sample2_YME1	Streptomyces misionensis	Streptomyces	MK968130.1	889	100	889/889	2
59	Sample2_YME2	Priestia aryabhattai (*3)	Priestia	PV478422.1	887	100	887/887	2
60	Sample2_YME3	Bacillus thuringiensis	Bacillus	MT193296.1	894	100	894/894	2
61	Sample2_YME4	Bacillus cereus	Bacillus	MT124530.1	895	100	895/895	2
62	Sample2_YME5	Bacillus cereus	Bacillus	MT271996.1	893	100	893/893	2
63	Sample2_YME6	Bacillus zanthoxyli (*1)	Bacillus	PQ814000.1	892	100	892/892	2
64	Sample2_YME7	Streptomyces misionensis	Streptomyces	MN594508.1	797	100	797/797	2
65	Sample2_YME8	Streptomyces deccanensis	Streptomyces	MN372369.1	807	99.75	805/807	2
66	Sample2_YME9	Priestia megaterium (*3)	Priestia	PQ870077.1	893	100	893/893	2
67	Sample2_YME10	Bacillus hominis	Bacillus	OR398816.1	481	100	481/481	2
68	Sample2_YME11	Bacillus mobilis	Bacillus	OP090403.1	893	100	893/893	2
69	Sample2_YME12	Streptomyces luteogriseus	Streptomyces	OM980673.1	906	99.89	906/906	2
70	Sample2_YME13	Bacillus aryabhattai (*1)	Bacilllus	MN515130.1	441	100	441/441	2
71	Sample2_YME14	Bacillus cereus	Bacillus	MT271996.1	895	100	895/895	2
72	Sample2_YME15	Streptomyces flavotricini	Streptomyces	KU870782.1	877	100	877/877	2
73	Sample2_YME16	Rhodococcus maanshanensis	Rhodococcus	PP710717.1	888	100	888/888	2
74	Sample2_YME17	Priestia aryabhattai (*3)	Priestia	PV478422.1	681	99.85	680/681	2
75	Sample2_YME18	Prescottella equi	Prescottella	LC552072.1	889	100	889/889	2
76	Sample3_YME1	Streptomyces violascens	Streptomyces	NR_112336.1 (*7)	896	99.67	893/896	3
77	Sample3_YME2	Dyella japonica	Dyella	OP102632.1	904	99.89	903/904	3
78	Sample3_YME3	Kitasatospora terrestris (*6)	Kitasatospora	PQ656686.1	888	100	888/888	3
79	Sample3_YME4	Streptomyces sp.	Streptomyces	EU159565.1	146	99.32	145/146	3
80	Sample3_YME5	Streptomyces sp.	Streptomyces	KF194350.1	916	99.78	914/916	3
81	Sample3_YME6	Streptomyces sp.	Streptomyces	EU159565.1	908	99.23	901/908	3
82	Sample3_YME7	Uncultured Burkholderia sp.	Burkholderia	LC070084.1	909	99.67	906/909	3
83	Sample3_YME8	Streptomyces chartreusis	Streptomyces	CP023689.1	207	99.52	206/207	3
84	Sample3_YME9	Kitasatospora terrestris	Kitasatospora	PQ656686.1	888	100	888/888	3
85	Sample3_YME10	Streptomyces rhizosphaerihabitans	Streptomyces	PQ358430.1	888	100	888/888	3
86	Sample3_YME11	Enterobacter sp.	Enterobacter	KY172853.1	815	99.63	812/815	3
87	Sample3_YME12	Dyella japonica	Dyella	KM605032.1	860	99.88	859/860	3
88	Sample3_YME13	Streptomyces osmaniensis	Streptomyces	MT197304.1	210	99.52	209/210	3
89	Sample3_YME14	Streptantibioticus ferralitis (*6)	Streptantibioticus	KC137302.1	920	99.35	914/920	3
90	Sample3_YME15	Streptomyces antimycoticus	Streptomyces	MN310344.1	209	100	209/209	3
91	Sample3_YME16	Streptomyces mauvecolor	Streptomyces	KP718571.1	886	100	886/886	3
92	Sample3_YME17	Bacillus cereus	Bacillus	JF836883.1	885	99.89	884/885	3
93	Sample3_YME18	Streptomyces olivochromogenes	Streptomyces	PQ625806.1	724	100	724/724	3
