# Supplementary material for: Leaf Mold Extract Agar Facilitates Recovery of Soil Bacterial Diversity Beyond Bacillus Dominance
Source: Research Square preprint supplement (doi:10.21203/rs.3.rs-7127727/v1), 2025-07-25
Supplement: Supplementary file 3 [file 8837e48417af8428dda5e460.xlsx]

## Sheet: Table S2
Supplementary Table S2. List of Bacteria Grown on Leaf Mold Agar Medium
A. Identified isolates
No.	Strain Name	Most closely related species	Genus	GenBank accession No.	Read length (bp)	Identity (%)	Identical base pair	Sample
1	Sample1_LME1	Streptomyces griseorubiginosus	Streptomyces	CP032427.1	889	100	889/889	1
2	Sample1_LME2	Streptomyces griseorubiginosus	Streptomyces	CP032427.1	826	100	826/826	1
3	Sample1_LME3	Rhizobium grahamii	Rhizobium	PP111665.1	922	99.89	911/912	1
4	Sample1_LME4	Actinacidiphila glaucinigra (*1)	Actinacidiphila	CP108152.1	896	100	896/896	1
5	Sample1_LME5	Streptomyces recifensis (*2)	Streptomyces	MH482905.1	795	100	795/795	1
6	Sample1_LME6	Actinacidiphila glaucinigra (*1)	Actinacidiphila	CP108152.1	885	100	885/885	1
7	Sample1_LME7	Streptomyces tanashiensis	Streptomyces	CP084204.1	865	100	865/865	1
8	Sample1_LME8	Streptomyces pseudovenezuelae	Streptomyces	LC425853.1	886	100	886/886	1
9	Sample1_LME9	Streptomyces osmaniensis	Streptomyces	MT197304.1	639	100	639/639	1
10	Sample1_LME10	Kitasatospora camelliae	Kitasatospora	PQ097302.1	783	100	783/783	1
11	Sample1_LME11	Lysobacter enzymogenes	Lysobacter	OR781337.1	853	100	853/853	1
12	Sample1_LME12	Rhizobium grahamii	Rhizobium	PP111665.1	885	99.77	883/885	1
13	Sample1_LME13	Streptomyces graminofaciens	Streptomyces	AP018448.1	815	99.75	813/815	1
14	Sample1_LME14	Streptomyces caeruleatus	Streptomyces	KY908431.1	895	100	895/895	1
15	Sample1_LME15	Streptomyces pseudovenezuelae	Streptomyces	MK519177.1	877	100	877/877	1
16	Sample1_LME16	Phyllobacterium brassicacearum	Phyllobacterium	MT065734.1	957	100	957/957	1
17	Sample1_LME17	Ramlibacter paludis	Ramlibacter	MW164935.1	820	100	820/820	1
18	Sample1_LME18	Rhizobium grahamii	Rhizobium	PP111665.1	906	99.89	905/906	1
19	Sample1_LME19	Rhizobium grahamii	Rhizobium	PP111665.1	892	99.89	891/892	1
20	Sample1_LME20	Kitasatospora camelliae	Kitasatospora	PQ097302.1	877	100	877/877	1
21	Sample1_LME21	Streptomyces tanashiensis	Streptomyces	CP084204.1	889	100	889/889	1
22	Sample1_LME22	Streptomyces avidinii	Streptomyces	MT525247.1	870	100	870/870	1
23	Sample1_LME23	Streptomyces canus	Streptomyces	MT525244.1	887	99.89	886/887	1
24	Sample1_LME24	Rhizobium sp.	Rhizobium	OM909440.1	824	100	824/824	1
25	Sample1_LME25	Actinacidiphila glaucinigra (*1)	Actinacidiphila	CP108152.1	890	100	890/890	1
26	Sample1_LME26	Streptomyces scabiei	Streptomyces	MN372369.1	739	99.86	738/739	1
27	Sample1_LME27	Rhizobium viscosum	Rhizobium	MT534119.1	903	100	903/903	1
28	Sample1_LME28	Streptomyces avidinii	Streptomyces	MT525247.1	887	100	887/887	1
29	Sample1_LME29	Rhizobium grahamii	Rhizobium	PP111665.1	897	99.89	896/897	1
30	Sample1_LME30	Streptomyces sp.	Streptomyces	MF197388.1	881	100	881/881	1
31	Sample1_LME31	Streptomyces virginiae	Streptomyces	MW037167.1	883	100	883/883	1
32	Sample1_LME32	Streptomyces sp.	Streptomyces	CP108095.1	907	99.89	906/907	1
33	Sample1_LME34	Rhizobium cauense	Rhizobium	KY292451.1	910	100	910/910	1
34	Sample1_LME35	Priestia megaterium (*3)	Priestia	CP150971.1	886	100	886/886	1
35	Sample1_LME36	Rhizobium grahamii	Rhizobium	PP111665.1	910	99.89	909/910	1
36	Sample1_LME37	Streptomyces chartreusis	Streptomyces	CP023689.1	897	100	897/897	1
37	Sample1_LME38	Streptomyces canus	Streptomyces	MT525244.1	887	99.89	886/887	1
38	Sample1_LME39	Streptomyces phaeofaciens	Streptomyces	KU324450.1	873	100	873/873	1
39	Sample1_LME40	Streptomyces sp.	Streptomyces	PP837890.1	886	100	886/886	1
40	Sample1_LME41	Variovorax gossypii	Variovorax	OQ422116.1	864	99.88	863/864	1
41	Sample1_LME42	Microvirga ossetica	Microvirga	PQ870330.1	923	99.89	922/923	1
42	Sample1_LME43	Pseudomonas koreensis	Pseudomonas	MN272363.1	938	100	938/938	1
43	Sample1_LME44	Lysobacter enzymogenes	Lysobacter	OQ383329.1	914	100	914/914	1
44	Sample1_LME45	Rhizobium viscosum	Rhizobium	MK135797.1	920	100	920/920	1
45	Sample1_LME46	Phyllobacterium pellucidum	Phyllobacterium	MN658537.1	805	100	805/805	1
46	Sample1_LME47	Streptomyces microflavus	Streptomyces	PV110951.1	792	100	792/792	1
47	Sample1_LME48	Streptomyces tanashiensis	Streptomyces	CP084204.1	826	100	826/826	1
48	Sample1_LME49	Streptomyces venezuelae	Streptomyces	CP029197.1	826	100	826/826	1
49	Sample1_LME50	Streptomyces populi	Streptomyces	OP364628.1	824	99.15	817/824	1
50	Sample1_LME51	Streptomyces populi	Streptomyces	OP364628.1	824	99.27	818/824	1
51	Sample1_LME52	Streptomyces lannensis	Streptomyces	MK026800.1	924	99.46	919/924	1
52	Sample1_LME53	Variovorax gossypii	Variovorax	OQ422116.1	894	99.89	893/894	1
53	Sample1_LME55	Ramlibacter paludis	Ramlibacter	MW164935.1	932	100	932/932	1
54	Sample1_LME56	Lysobacter enzymogenes	Lysobacter	OQ383329.1	877	99.43	872/877	1
55	Sample1_LME58	Streptomyces chartreusis	Streptomyces	CP023689.1	838	100	838/838	1
56	Sample1_LME59	Lysobacter prati	Lysobacter	OR431958.1	922	99.89	921/922	1
57	Sample1_LME60	Streptomyces canus	Streptomyces	MT525246.1	882	99.21	875/882	1
58	Sample1_LME63	Peristeroidobacter agariperforans	Peristeroidobacter	MW186159.1	908	99.56	904/908	1
59	Sample1_LME64	Streptomyces osmaniensis	Streptomyces	MT197304.1	770	98.83	761/770	1
60	Sample1_LME65	Streptomyces chartreusis	Streptomyces	MG385711.1	936	100	936/936	1
61	Sample1_LME66	Streptomyces canus	Streptomyces	MT525244.1	916	99.89	915/916	1
62	Sample1_LME67	Lysobacter enzymogenes	Lysobacter	OQ383329.1	942	99.47	937/942	1
63	Sample1_LME68	Brevundimonas alba	Brevundimonas	OQ255329.1	871	99.66	868/871	1
64	Sample1_LME70	Streptomyces chartreusis	Streptomyces	CP023689.1	888	100	888/888	1
65	Sample1_LME71	Streptomyces goshikiensis	Streptomyces	MT197301.1	898	100	898/898	1
66	Sample2_LME1	Streptomyces luteogriseus	Streptomyces	OM980673.1	802	99.88	801/802	2
67	Sample2_LME2	Streptomyces virginiae	Streptomyces	MT525258.1	888	100	888/888	2
68	Sample2_LME3	Actinophytocola corallina	Actinophytocola	NR_112955.1 (*5)	491	98.98	486/491	2
69	Sample2_LME4	Bacillus sp. (*4)	Bacillus	MT102725.1	894	100	894/894	2
70	Sample2_LME5	Paenibacillus terricola	Paenibacillus	MN496382.1	778	99.61	775/778	2
71	Sample2_LME6	Streptomyces scabiei	Streptomyces	PQ810078.1	899	99.89	898/899	2
72	Sample2_LME7	Priestia megaterium (*3)	Priestia	CP150971.1	892	100	892/892	2
73	Sample2_LME8	Priestia aryabhattai (*3)	Priestia	MZ067916.1	891	100	891/891	2
74	Sample2_LME9	Streptomyces misionensis	Streptomyces	MK968130.1	889	100	889/889	2
75	Sample2_LME10	Priestia aryabhattai (*3)	Priestia	PV478422.1	887	100	887/887	2
76	Sample2_LME11	Streptomyces akebiae	Streptomyces	CP080647.1	890	100	890/890	2
77	Sample2_LME13	Streptomyces luteogriseus	Streptomyces	OM980673.1	890	100	890/890	2
78	Sample2_LME14	Paenibacillus xanthanilyticus	Paenibacillus	NR_159286.1 (*5)	821	99.63	828/821	2
79	Sample2_LME15	Streptomyces lincolnensis	Streptomyces	KU870779.1	890	99.55	886/890	2
80	Sample2_LME16	Streptomyces neyagawaensis	Streptomyces	NR_025868.2 (*5)	890	100	890/890	2
81	Sample2_LME17	Streptomyces neyagawaensis	Streptomyces	NR_025868.2 (*5)	827	100	827/827	2
82	Sample2_LME18	Priestia aryabhattai (*3)	Priestia	PV478422.1	887	100	887/887	2
83	Sample2_LME19	Actinophytocola corallina	Actinophytocola	NR_112955.1 (*5)	888	98.87	878/888	2
84	Sample2_LME20	Streptomyces misionensis	Streptomyces	MK968130.1	889	100	889/889	2
85	Sample2_LME21	Bacillus sp. (*4)	Bacillus	MT102725.1	894	100	894/894	2
86	Sample2_LME22	Bacillus sp. (*4)	Bacillus	MT102725.1	894	100	894/894	2
87	Sample2_LME23	Actinophytocola corallina	Actinophytocola	NR_112955.1 (*5)	591	99.15	586/591	2
88	Sample2_LME25	Actinophytocola corallina	Actinophytocola	NR_112955.1 (*5)	497	98.99	492/497	2
89	Sample2_LME26	Bradyrhizobium lablabi	Bradrhizobium	LT670844.1	898	100	898/898	2
90	Sample2_LME27	Streptomyces luteogriseus	Streptomyces	OM980673.1	519	100	519/519	2
91	Sample2_LME28	Actinophytocola corallina	Actinophytocola	NR_112955.1 (*5)	648	99.23	643/648	2
92	Sample3_LME1	Pinibacter aurantiacus	Pinbacter	MH368770.2	873	99.54	869/873	3
93	Sample3_LME2	Streptomyces bungoensis	Streptomyces	MT124448.1	367	100	367/367	3
94	Sample3_LME3	Rhizobium sp.	Rhizobium	KY445677.1	887	100	887/887	3
95	Sample3_LME4	Streptomyces kronopolitis	Streptomyces	ON819565.1	910	100	910/910	3
96	Sample3_LME5	Uncultured Dyella sp.	Dyella	PP780941.1	907	100	907/907	3
97	Sample3_LME6	Streptomyces mirabilis	Streptomyces	MK254602.1	824	100	824/824	3
98	Sample3_LME7	Paraburkholderia caribensis	Paraburkholderia	MG270180.1	845	100	845/845	3
99	Sample3_LME8	Kitasatospora herbaricolor (*1)	Kitasatospora	MT081107.1	889	100	889/889	3
100	Sample3_LME9	Streptomyces kronopolitis	Streptomyces	ON819565.1	908	100	908/908	3
101	Sample3_LME10	Kitasatospora herbaricolor (*1)	Kitasatospora	MT081107.1	150	100	150/150	3
102	Sample3_LME11	Buttiauxella sp.	Buttiauxella	CP110080.1	850	98.94	841/850	3
103	Sample3_LME12	Caulobacter sp.	Caulobacter	JQ977670.1	884	100	884/884	3
104	Sample3_LME13	Neorhizobium xiangyangii	Neorhizobium	MT611284.1	765	99.22	759/765	3
105	Sample3_LME14	Uncultured Caulobacter sp.	Caulobacter	JQ977670.1	914	100	914/914	3
106	Sample3_LME15	Streptomyces sp.	Streptomyces	CP108774.1	889	99.89	888/889	3
107	Sample3_LME16	Streptomyces sp.	Streptomyces	OQ155109.1	387	99.74	386/387	3
108	Sample3_LME17	Streptomyces sp.	Streptomyces	KX023623.1	300	100	300/300	3
109	Sample3_LME18	Arthrobacter globiformis	Arthrobacter	ON838146.1	872	99.77	870/872	3
110	Sample3_LME19	Uncultured Dyella sp.	Dyella	PP780941.1	906	100	906/906	3
111	Sample3_LME20	Labrys miyagiensis	Labrys	AB681465.1	917	100	917/917	3
112	Sample3_LME21	Phenylobacterium sp.	Phenylobacterium	OR878925.1	905	99.89	904/905	3
113	Sample3_LME22	Nocardioides sp.	Nocardoides	LN876367.1	125	100	125/125	3
114	Sample3_LME24	Weissella paramesenteroides	Weissella	PV270261.1	698	99.57	695/698	3
115	Sample3_LME25	Conexibacter sp.	Conexibacter	MK875928.1	907	99.01	898/907	3
116	Sample3_LME26	Mesorhizobium qingshengii	Mesorhizobium	PV018831.1	895	100	895/895	3
117	Sample3_LME27	Labrys sp.	Labrys	OQ647604.1	898	100	898/898	3
118	Sample3_LME28	Cellulomonas sp.	Cellulomonas	OQ346295.1	660	99.85	659/660	3
119	Sample3_LME29	Rhizobium sp.	Rhizobium	LC372620.1	656	100	656/656	3
120	Sample3_LME30	Caballeronia sp.	Caballeronia	OR373818.1	746	99.46	742/746	3
121	Sample3_LME31	Nocardioides sp.	Nocardoides	JQ977357.1	860	99.77	858/860	3
122	Sample3_LME34	Cupriavidus sp.	Cupriavidus	KY381884.1	908	99.01	899/908	3
123	Sample3_LME35	Silvimonas terrae	Silvimonas	NR_113961.1	144	100	144/144	3
124	Sample3_LME36	Mesorhizobium qingshengii	Mesorhizobium	PV018831.1	895	100	895/895	3
125	Sample3_LME37	Dyella japonica	Dyella	OP102632.1	876	99.89	875/876	3
126	Sample3_LME38	Weissella paramesenteroides	Weissella	JN863617.1	644	99.84	644/645	3
127	Sample3_LME39	Labrys monachus	Labrys	MT534155.1	600	99.5	597/600	3
B. Unidentified isolates: identity was less than 98.7%
No.	Strain Name	Most closely related species	Genus	GenBank accession No.	Read length (bp)	Identity (%)	Identical base pair	Sample
128	Sample1_LME33	Duganella sp.	Not determined	JQ745646.1	837	98.69	826/837	1
129	Sample1_LME54	Paraflavitalea speifideaquila	Not determined	CP135920.1	367	98.09	360/367	1
130	Sample1_LME57	Uncultured Ohtaekwangia sp.	Not determined	JQ771968.1	954	97.79	931/952	1
131	Sample1_LME61	Ramlibacter monticola	Not determined	PP595918.1	867	98,27	852/867	1
132	Sample1_LME62	Niastella sp.	Not determined	MH490984.1	890	96.77	839/867	1
133	Sample1_LME69	Niastella sp.	Not determined	MH490984.1	931	96,93	883/911	1
134	Sample2_LME12	Uncultured Cohnella sp.	Not determined	KJ749163.1	279	97.49	272/279	2
135	Sample2_LME24	Actinophytocola corallina	Not determined	NR_112955.1 (*5)	219	97.72	214/219	2
136	Sample3_LME23	Labrys sp.	Not determined	OQ647604.1	245	98.37	241/245	3
137	Sample3_LME32	Catenulispora sp. strain	Not determined	PQ637139.1	149	97.32	145/149	3
138	Sample3_LME33	Jatrophihabitans sp.	Not determined	MK875924.1	262	95.38	248/260	3
